# Supplementary material for: Accuracy and cost-effectiveness of different screening strategies for identifying undiagnosed COPD among primary care patients (≥40 years) in China: a cross-sectional screening test accuracy study: findings from the Breathe Well group
Source: PubMed Central journal article supplement — BMJ Open. 2021 Sep 23;11(9):e051811. doi: 10.1136/bmjopen-2021-051811 (PMC8461701; doi:10.1136/bmjopen-2021-051811), 2021-09-23
Supplement: bmjopen-2021-051811supp002.pdf [file bmjopen-2021-051811supp002.pdf]

**Appendix 2: Costs, timings and assumptions for case-finding strategies**

| <b>Assessment timings</b>                                                                                       | <b>Minutes per patient</b> |
|-----------------------------------------------------------------------------------------------------------------|----------------------------|
| Symptom questionnaire (completion and processing)                                                               | 6                          |
| Peak flow                                                                                                       | 2                          |
| Microspirometry                                                                                                 | 4                          |
| Confirmatory NDD spirometry                                                                                     | 30                         |
| <b>Staff</b>                                                                                                    | <b>Hourly costs (UK £)</b> |
| Clinic staff                                                                                                    | 6.25                       |
| <b>Additional unit costs</b>                                                                                    | <b>(UK £)</b>              |
| <i>Symptom questionnaire</i>                                                                                    | 0.10                       |
| <i>Peak flow</i>                                                                                                |                            |
| Mouthpiece cost per patient                                                                                     | 0.10                       |
| Overall equipment cost                                                                                          | 8.00                       |
| Other consumable costs per patient                                                                              | 0.21                       |
| <i>Microspirometry (COPD-6)</i>                                                                                 |                            |
| Mouthpiece cost per patient                                                                                     | 0.10                       |
| Overall equipment cost                                                                                          | 75.00                      |
| Battery cost per year                                                                                           | 5.00                       |
| Other consumable costs per patient                                                                              | 0.21                       |
| <i>Confirmatory NDD spirometry</i>                                                                              |                            |
| Mouthpiece cost per patient                                                                                     | 1.30                       |
| Overall equipment cost                                                                                          | 1,095                      |
| Salbutamol cost per patient                                                                                     | 0.70                       |
| Other consumable and equipment costs per patient                                                                | 0.25                       |
| <b>Assumptions</b>                                                                                              |                            |
| Number of visits per year per case finding clinic (assuming 48 tests per day, 5 days a week, 50 weeks a year)   | 12,000                     |
| Number of visits per year per NDD spirometry clinic (assuming 16 tests per day, 5 days a week, 50 weeks a year) | 4,000                      |
| Lifetime of peak flow meter                                                                                     | 1 year                     |
| Lifetime of microspirometry                                                                                     | 6 years                    |
| Lifetime of NDD spirometry                                                                                      | 6 years                    |
| Proportion of patients requiring staff assistance with questionnaire                                            | 95%                        |
| <b>Cost of case finding method per patient</b>                                                                  | <b>(UK £)</b>              |
| Symptom questionnaire                                                                                           | 0.70                       |
| Peak flow                                                                                                       | 0.52                       |
| Microspirometry                                                                                                 | 0.73                       |
| Confirmatory NDD spirometry                                                                                     | 4.90                       |
