# Supplementary material for: Accuracy and cost-effectiveness of different screening strategies for identifying undiagnosed COPD among primary care patients (≥40 years) in China: a cross-sectional screening test accuracy study: findings from the Breathe Well group
Source: PubMed Central journal article supplement — BMJ Open. 2021 Sep 23;11(9):e051811. doi: 10.1136/bmjopen-2021-051811 (PMC8461701; doi:10.1136/bmjopen-2021-051811), 2021-09-23
Supplement: bmjopen-2021-051811supp003.pdf [file bmjopen-2021-051811supp003.pdf]

**Appendix 3-TABLE 1: SERIAL (AND) STRATEGIES (sensitivity)**

Comparing each **combination** (questionnaire & lung function test) against the **lung function test alone**

| Strategies                | Peak flow                       | Microspirometry                  |
|---------------------------|---------------------------------|----------------------------------|
| CAPTURE + peak flow       | -25.5<br>(-30.5,-20.5; <0.0001) |                                  |
| CDQ + peak flow           | -22.8<br>(-27.6,-18.0; <0.0001) |                                  |
| C-SBQ + peak flow         | -17.4<br>(-21.8,-13.0; <0.0001) |                                  |
| COPD-SQ + peak flow       | -22.5<br>(-27.3,-17.7; <0.0001) |                                  |
| CAPTURE + microspirometry |                                 | -27.0<br>(-32.1,-22.0; <0.0001)  |
| CDQ + microspirometry     |                                 | -23.4<br>(-28.3, -18.6; <0.0001) |
| C-SBQ + microspirometry   |                                 | -18.3<br>(-22.8,-13.9; <0.0001)  |
| COPD-SQ + microspirometry |                                 | -23.4<br>(-28.3,-18.6; <0.0001)  |

Note: Values indicate the difference in sensitivity (with 95% CI & p values), comparing strategies in the column against strategies in the row. For example, sensitivity for CAPTURE + peak flow is 25.5% lower than for peak flow (95%CI -30.5, -20.5; <0.0001).

**Appendix 3-TABLE 2: SERIAL (AND) STRATEGIES (specificity)**

Comparing each **combination** (questionnaire & lung function test) against the **lung function test alone**

| Strategies                | Peak flow                    | Microspirometry            |
|---------------------------|------------------------------|----------------------------|
| CAPTURE + peak flow       | 11.1<br>(9.7, 12.5; <0.0001) |                            |
| CDQ + peak flow           | 10.0<br>(8.7, 11.4; <0.0001) |                            |
| C-SBQ + peak flow         | 8.7<br>(7.5, 10.0; <0.0001)  |                            |
| COPD-SQ + peak flow       | 9.8<br>(8.5, 11.2; <0.0001)  |                            |
| CAPTURE + microspirometry |                              | 6.4<br>(5.3, 7.5; <0.0001) |
| CDQ + microspirometry     |                              | 6.3<br>(5.3, 7.4; <0.0001) |
| C-SBQ + microspirometry   |                              | 6.2<br>(5.1, 7.2; <0.0001) |
| COPD-SQ + microspirometry |                              | 6.7<br>(5.6, 7.8; <0.0001) |

Note: Values indicate the difference in specificity (with 95% CI & p values), comparing strategies in the column against strategies in the row. For example, specificity for CAPTURE + peak flow is 11.1% higher than for peak flow (95%CI 9.7, 12.5; <0.0001).

**Appendix 3-TABLE 3: SERIAL (AND) STRATEGIES (sensitivity)**Comparing each **combination** (questionnaire & lung function test) against the **questionnaire alone**

| Strategies                | CAPTURE                         | CDQ                             | C-SBQ                            | COPD-SQ                         |
|---------------------------|---------------------------------|---------------------------------|----------------------------------|---------------------------------|
| CAPTURE + peak flow       | -9.9<br>(-13.4, -6.4; <0.0001)  |                                 |                                  |                                 |
| CAPTURE + microspirometry | -13.8<br>(-17.8, -9.8; <0.0001) |                                 |                                  |                                 |
| CDQ + peak flow           |                                 | -10.5<br>(-14.1, -6.9; <0.0001) |                                  |                                 |
| CDQ + microspirometry     |                                 | -13.5<br>(-17.5, -9.5; <0.0001) |                                  |                                 |
| C-SBQ + peak flow         |                                 |                                 | -13.2<br>(-17.2, -9.3; <0.0001)  |                                 |
| C-SBQ + microspirometry   |                                 |                                 | -16.5<br>(-20.8, -12.2; <0.0001) |                                 |
| COPD-SQ + peak flow       |                                 |                                 |                                  | -10.5<br>(-14.1, -6.9; <0.0001) |
| COPD-SQ + microspirometry |                                 |                                 |                                  | -13.8<br>(-17.8, 9.8; <0.0001)  |

Note: Values indicate the difference in sensitivity (with 95% CI & p values), comparing strategies in the column against strategies in the row. For example, sensitivity for CAPTURE is 3.3% lower than for CDQ (95%CI -9.6, 2.9; 0.3245).

**Appendix 3-TABLE 4: SERIAL (AND) STRATEGIES (specificity)**Comparing each **combination** (questionnaire & lung function test) against the **questionnaire alone**

|                           | CAPTURE                      | CDQ                           | C-SBQ                         | COPD-SQ                       |
|---------------------------|------------------------------|-------------------------------|-------------------------------|-------------------------------|
| CAPTURE + peak flow       | 23.4<br>(21.6,25.3; <0.0001) |                               |                               |                               |
| CAPTURE + microspirometry | 25.9<br>(24.0,27.8; <0.0001) |                               |                               |                               |
| CDQ + peak flow           |                              | 14.0<br>(12.4, 15.5; <0.0001) |                               |                               |
| CDQ + microspirometry     |                              | 17.4<br>(15.8, 19.1; <0.0001) |                               |                               |
| C-SBQ + peak flow         |                              |                               | 17.1<br>(15.4, 18.7; <0.0001) |                               |
| C-SBQ + microspirometry   |                              |                               | 21.7<br>(19.9, 23.5; <0.0001) |                               |
| COPD-SQ + peak flow       |                              |                               |                               | 15.1<br>(13.5, 16.7; <0.0001) |
| COPD-SQ + microspirometry |                              |                               |                               | 19.1<br>(17.4, 20.8; <0.0001) |

Note: Values indicate the difference in specificity (with 95% CI & p values), comparing strategies in the column against strategies in the row. For example, specificity for CAPTURE + peak flow is 23.4% higher than for CAPTURE (95%CI 21.6, 25.3; <0.0001).

**Appendix 3-TABLE 5: PARALLEL (OR) STRATEGIES (sensitivity)**

Comparing each **combination** (questionnaire & lung function test) against the **lung function test alone**

|                           | Peak flow                    | Microspirometry               |
|---------------------------|------------------------------|-------------------------------|
| CAPTURE + peak flow       | 9.9<br>(6.4, 13.4; <0.0001)  |                               |
| CDQ + peak flow           | 10.5<br>(6.9, 14.1; <0.0001) |                               |
| C-SBQ + peak flow         | 13.2<br>(9.3, 17.2; <0.0001) |                               |
| COPD-SQ + peak flow       | 10.5<br>(6.9, 14.1; <0.0001) |                               |
| CAPTURE + microspirometry |                              | 13.8<br>(9.8, 17.8; <0.0001)  |
| CDQ + microspirometry     |                              | 13.5<br>(9.5, 17.5; <0.0001)  |
| C-SBQ + microspirometry   |                              | 16.5<br>(12.2, 20.8; <0.0001) |
| COPD-SQ + microspirometry |                              | 13.8<br>(9.8, 17.8; <0.0001)  |

Note: Values indicate the difference in sensitivity (with 95% CI & p values), comparing strategies in the column against index tests in the row. For example, sensitivity for CAPTURE + peak flow is 9.9% higher than for peak flow (95%CI 6.4, 13.4; <0.0001).

**Appendix 3-TABLE 6: PARALLEL (OR) STRATEGIES (specificity)**

Comparing each **combination** (questionnaire & lung function test) against the **lung function test alone**

|                           | Peak flow                        | Microspirometry                  |
|---------------------------|----------------------------------|----------------------------------|
| CAPTURE + peak flow       | -23.4<br>(-25.3, -21.6; <0.0001) |                                  |
| CDQ + peak flow           | -14.0<br>(-15.5, -12.4; <0.0001) |                                  |
| C-SBQ + peak flow         | -17.1<br>(-18.7, -15.4; <0.0001) |                                  |
| COPD-SQ + peak flow       | -15.1<br>(-16.7, -13.5; <0.0001) |                                  |
| CAPTURE + microspirometry |                                  | -25.9<br>(-27.8, -24.0; <0.0001) |
| CDQ + microspirometry     |                                  | -17.4<br>(-19.1, -15.8; <0.0001) |
| C-SBQ + microspirometry   |                                  | -21.7<br>(-23.5, -19.9; <0.0001) |
| COPD-SQ + microspirometry |                                  | -19.1<br>(-20.8, -17.4; <0.0001) |

Note: Values indicate the difference in specificity (with 95% CI & p values), comparing strategies in the column against strategies in the row. For example, specificity for CAPTURE + peak flow is 23.4% lower than for peak flow (95%CI -25.3, -21.6; <0.0001).

**Appendix 3-TABLE 7: PARALLEL (OR) STRATEGIES (sensitivity)**Comparing each **combination** (questionnaire & lung function test) against the **questionnaire alone**

| Strategies                | CAPTURE                       | CDQ                           | C-SBQ                         | COPD-SQ                        |
|---------------------------|-------------------------------|-------------------------------|-------------------------------|--------------------------------|
| CAPTURE + peak flow       | 25.5<br>(20.5, 30.5; <0.0001) |                               |                               |                                |
| CAPTURE + microspirometry | 27.0<br>(22.0, 32.1; <0.0001) |                               |                               |                                |
| CDQ + peak flow           |                               | 22.8<br>(18.1, 27.6; <0.0001) |                               |                                |
| CDQ + microspirometry     |                               | 23.4<br>(18.6, 28.3; <0.0001) |                               |                                |
| C-SBQ + peak flow         |                               |                               | 17.4<br>(13.0, 21.8; <0.0001) |                                |
| C-SBQ + microspirometry   |                               |                               | 18.3<br>(13.9, 22.8; <0.0001) |                                |
| COPD-SQ + peak flow       |                               |                               |                               | 22.5<br>(17.7, 27.3; <0.0001)  |
| COPD-SQ + microspirometry |                               |                               |                               | 23.4<br>(18.6, .28.3; <0.0001) |

Note: Values indicate the difference in sensitivity (with 95% CI & p values), comparing strategies tests in the column against strategies in the row. For example, sensitivity for CAPTURE + peak flow is 25.5% higher than for CAPTURE (95%CI 20.5, 30.5; <0.0001).

**Appendix 3-TABLE 8: PARALLEL (OR) STRATEGIES (specificity)**Comparing each **combination** (questionnaire & lung function test) against the **questionnaire alone**

|                           | CAPTURE                         | CDQ                             | C-SBQ                          | COPD-SQ                        |
|---------------------------|---------------------------------|---------------------------------|--------------------------------|--------------------------------|
| CAPTURE + peak flow       | -11.1<br>(-12.5, -9.7; <0.0001) |                                 |                                |                                |
| CAPTURE + microspirometry | -6.4<br>(-7.5, -5.3; <0.0001)   |                                 |                                |                                |
| CDQ + peak flow           |                                 | -10.0<br>(-11.4, -8.7; <0.0001) |                                |                                |
| CDQ + microspirometry     |                                 | -6.3<br>(-7.4, -5.3; <0.0001)   |                                |                                |
| C-SBQ + peak flow         |                                 |                                 | -8.7<br>(-10.0, -7.5; <0.0001) |                                |
| C-SBQ + microspirometry   |                                 |                                 | -6.2<br>(-7.2, -5.1; <0.0001)  |                                |
| COPD-SQ + peak flow       |                                 |                                 |                                | -9.8<br>(-11.2, -8.5; <0.0001) |
| COPD-SQ + microspirometry |                                 |                                 |                                | -6.7<br>(-7.8, -5.6; <0.0001)  |

Note: Values indicate the difference in specificity (with 95% CI & p values), comparing strategies in the column against index tests in the row. For example, specificity for CAPTURE + peak flow is 11.1% lower than for CAPTURE (95%CI -12.5, -9.7; <0.0001).
